# Supplementary material for: Insulin Signaling in Insulin Resistance States and Cancer: A Modeling Analysis
Source: PubMed Central journal article supplement (PMC4858213; doi:10.1371/journal.pone.0154415), 2016-05-05

Sensitivity Analysis L6 (Ctr)

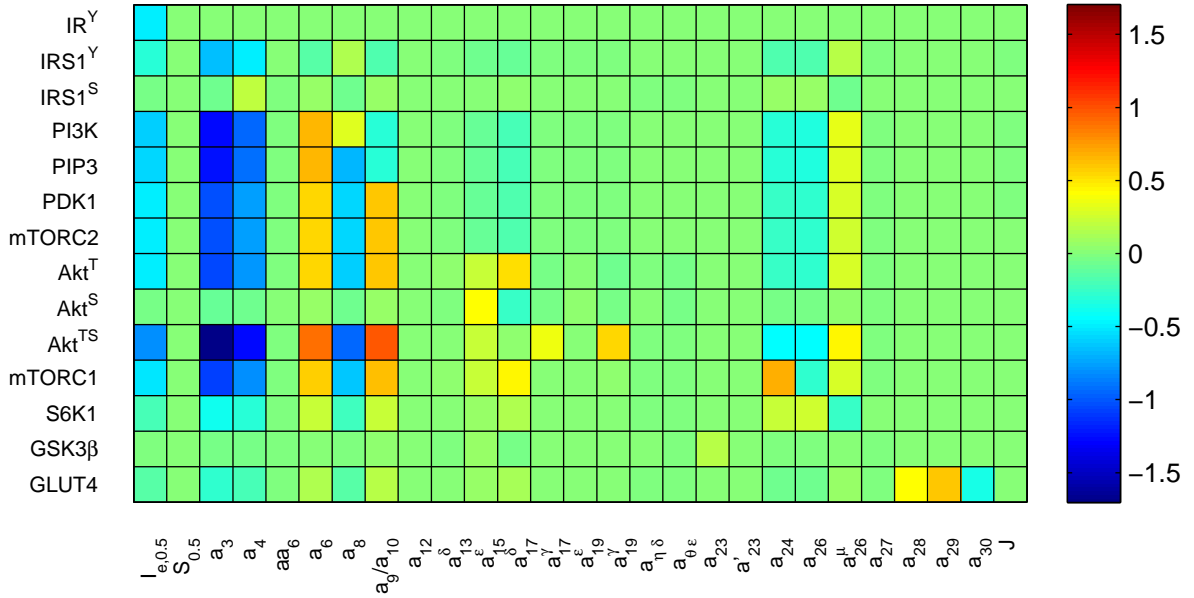

Sensitivity Analysis L6 (db/db)

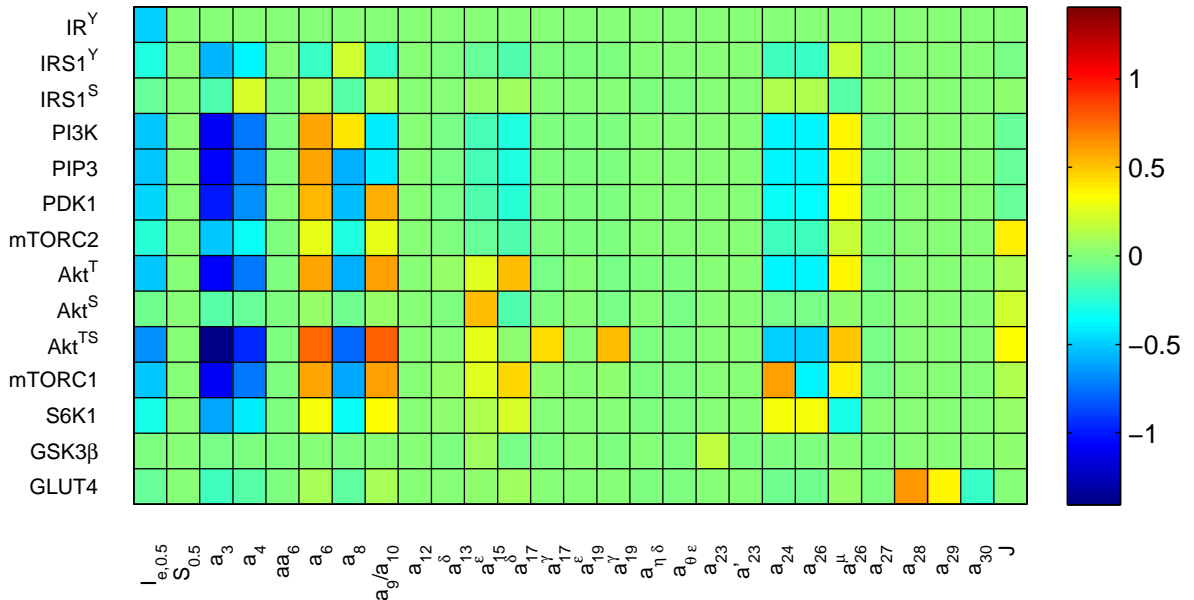

Supplement: pone.0154415.s004.pdf [file pone.0154415.s004.pdf]
