# Supplementary material for: Insulin Signaling in Insulin Resistance States and Cancer: A Modeling Analysis
Source: PubMed Central journal article supplement (PMC4858213; doi:10.1371/journal.pone.0154415), 2016-05-05
Supplement: pone.0154415.s007.pdf [file pone.0154415.s007.pdf]

**Table S1. Expression of ISN model parameters in Eqs. (1)-(16) of section Models in terms of the kinetic parameters of the equations in Text S2.**

| Molecule               | Parameter    | Expression                                                                                                                                          |
|------------------------|--------------|-----------------------------------------------------------------------------------------------------------------------------------------------------|
| <i>IR</i>              | $a_b$        | $k_b / \left( \frac{k_{0c}}{K_{m,0}} \right)$                                                                                                       |
|                        | $a_0$        | $\left( \mu_{IR} + \frac{k_{1c}}{K_{m,1}} \cdot \frac{b_{PTP1B}}{\mu_{PTP1B}} \right) / \left( \frac{k_{0c}}{K_{m,0}} \right)$                      |
|                        | $a_1$        | $\frac{b_{IR}}{\mu_{IR}} \cdot \frac{1}{k_{0c}} \left( k_{0c} + \mu_{IR} + \frac{k_{1c}}{K_{m,1}} \cdot \frac{b_{PTP1B}}{\mu_{PTP1B}} \right)$      |
| <i>IRS1</i>            | $a_2$        | $\mu_{IRS1} \left( \frac{k_{2c}}{K_{m,2}} \cdot \frac{b_{IR}}{\mu_{IR}} \right)^{-1}$                                                               |
|                        | $a_3$        | $\frac{k_{3c}}{K_{m,3}} \cdot \frac{b_{PTP1B}}{\mu_{PTP1B}} \left( \frac{k_{2c}}{K_{m,2}} \cdot \frac{b_{IR}}{\mu_{IR}} \right)^{-1}$               |
|                        | $a_4$        | $\frac{k_{4c}}{\alpha K_{m,4}} \cdot \frac{b_{S6K1}}{\mu_{S6K1}}$                                                                                   |
| <i>PTP1B</i>           | $a_p$        | $\frac{k_{pc}}{(\mu_{PTP1B} + k_{-p})K_{m,p}} \cdot \frac{b_{Akt}}{\mu_{Akt}}$                                                                      |
| <i>PI3K</i>            | $a'_6$       | $\frac{F}{E} \cdot \frac{b_{IRS1}}{\mu_{IRS1}}$                                                                                                     |
|                        | $a_6$        | $\frac{1}{E} \frac{k'_{6c}}{K'_{m,6}} \frac{k_{6c}}{K_{m,6}} \left( \frac{b_{IRS1}}{\mu_{IRS1}} \right)^2$                                          |
| <i>PIP<sub>3</sub></i> | $a_7$        | $\mu_{PI} / \left( \frac{k_{7c}}{K_{m,7}} \cdot \frac{b_{PI3K}}{\mu_{PI3K}} \right)$                                                                |
|                        | $a_8$        | $\left( \frac{k_{8c}}{K_{m,8}} \cdot \frac{b_{PTEN}}{\mu_{PTEN}} \right) / \left( \frac{k_{7c}}{K_{m,7}} \cdot \frac{b_{PI3K}}{\mu_{PI3K}} \right)$ |
| <i>PDK1</i>            | $a_9$        | $\frac{k_{9c}}{(\mu_{PDK1} + k_{-9})K_{m,9}} \cdot \frac{b_{PIP3}}{\mu_{PIP3}}$                                                                     |
| <i>mTORC2</i>          | $a_{10}$     | $\frac{k_{10c}}{(k_{-10} + k_{-11})K_{m,10}} \cdot \frac{b_{PIP3}}{\mu_{PIP3}}$                                                                     |
|                        | $a_{10}^\mu$ | $\frac{\mu_{mTORC2}}{k_{-10} + k_{-11}}$                                                                                                            |
|                        | $a_{11}$     | $\frac{k_{11c}}{(k_{-10} + k_{-11})K_{m,11}}$                                                                                                       |
|                        | $a_{12}$     | $\frac{k_{12c}}{(\mu_{mTORC2} + k_{-12})K_{m,12}} \cdot \frac{b_{S6K1}}{\mu_{S6K1}}$                                                                |

|                               |                         |                                                                                                                                                                           |
|-------------------------------|-------------------------|---------------------------------------------------------------------------------------------------------------------------------------------------------------------------|
| <i>Akt</i>                    | $a_{13}^{\delta}$       | $\frac{k_{13c}}{K_{m,13}} \cdot \frac{b_{PDK1}}{\mu_{PDK1}} \frac{1}{\delta}$                                                                                             |
|                               | $a_{15}^{\varepsilon}$  | $\frac{k_{15c}}{K_{m,15}} \cdot \frac{b_{mTORC2}}{\mu_{mTORC2}} \frac{1}{\varepsilon}$                                                                                    |
|                               | $a_{17}^{\delta}$       | $\frac{k_{17c}}{K_{m,17}} \cdot \frac{b_{PDK1}}{\mu_{PDK1}} \frac{1}{\delta}$                                                                                             |
|                               | $a_{17}^{\gamma}$       | $\frac{k_{17c}}{K_{m,17}} \cdot \frac{b_{PDK1}}{\mu_{PDK1}} \frac{1}{\gamma}$                                                                                             |
|                               | $a_{19}^{\varepsilon}$  | $\frac{k_{19c}}{K_{m,19}} \cdot \frac{b_{mTORC2}}{\mu_{mTORC2}} \frac{1}{\varepsilon}$                                                                                    |
|                               | $a_{19}^{\gamma}$       | $\frac{k_{19c}}{K_{m,19}} \cdot \frac{b_{mTORC2}}{\mu_{mTORC2}} \frac{1}{\gamma}$                                                                                         |
|                               | $a_{\theta\varepsilon}$ | $\theta/\varepsilon$                                                                                                                                                      |
|                               | $a_{\eta\delta}$        | $\eta/\delta$                                                                                                                                                             |
| <i>FoxO1</i>                  | $a_{21}$                | $\frac{1}{\mu_{deg} + k_{-21}} \cdot \frac{k_{21c}}{K_{m,21}} \frac{b_{Akt}}{\mu_{Akt}}$                                                                                  |
| <i>GSK3<math>\beta</math></i> | $a_{23}$                | $\frac{1}{\mu_{GSK3} + k_{-23}} \cdot \frac{k_{23c}}{K_{m,23}} \frac{b_{Akt}}{\mu_{Akt}}$                                                                                 |
|                               | $a'_{23}$               | $\frac{1}{\mu_{GSK3} + k'_{-23}} \cdot \frac{k'_{23c}}{K'_{m,23}}$                                                                                                        |
| <i>mTORC1</i>                 | $a_{24}$                | $\frac{1}{\mu_{mTORC1} + k_{-24}} \cdot \frac{k_{24c}}{K_{m,24}} \frac{b_{Akt}}{\mu_{Akt}}$                                                                               |
| <i>S6K1</i>                   | $a_{26}$                | $\frac{k_{26c}/K_{m,26}}{\mu_{S6K1} + k_{-26}} \cdot \frac{b_{mTORC1}}{\mu_{mTORC1}}$                                                                                     |
|                               | $a_{26}^{\mu}$          | $\frac{\mu_{S6K1}}{\mu_{S6K1} + k_{-26}}$                                                                                                                                 |
|                               | $a_{27}$                | $\frac{k_{27c}/K_{m,27}}{\mu_{S6K1} + k_{-27}} \cdot \frac{b_{PDK1}}{\mu_{PDK1}}$                                                                                         |
| <i>GLUT4</i>                  | $a_{28}$                | $\frac{\omega\rho + \omega(\mu_{Rab} + k_{-29}) + \sigma}{\rho + \mu_{Rab} + k_{-29} + \sigma}$                                                                           |
|                               | $a_{29}$                | $\frac{[\omega(\mu_{Rab} + k_{-29}) + \sigma]}{(\rho + \mu_{Rab} + k_{-29} + \sigma)(\mu_{AS} + k_{-28})} \cdot \frac{k_{28c}}{K_{m,28}} \cdot \frac{b_{Akt}}{\mu_{Akt}}$ |
|                               | $a_{30}$                | $\frac{\mu_{Rab} + k_{-29} + \sigma}{(\rho + \mu_{Rab} + k_{-29} + \sigma)(\mu_{AS} + k_{-28})} \cdot \frac{k_{28c}}{K_{m,28}} \cdot \frac{b_{Akt}}{\mu_{Akt}}$           |
