# Supplementary material for: Insulin Signaling in Insulin Resistance States and Cancer: A Modeling Analysis
Source: PubMed Central journal article supplement (PMC4858213; doi:10.1371/journal.pone.0154415), 2016-05-05
Supplement: pone.0154415.s008.pdf [file pone.0154415.s008.pdf]

**Table S2. Parameters in Eqs. (1)-(16) in Models estimated from data of C2C12 and L6 cells.**

| Parameters*                   |                               | C2C12               | L6                  |                      |
|-------------------------------|-------------------------------|---------------------|---------------------|----------------------|
|                               |                               |                     | Ctr                 | db/db                |
| <i>IR</i>                     | $I_{e,0.5}$ (nM)              | 44.68               | 9.69                | –                    |
|                               | $S_{0.5}$ (nM <sup>-1</sup> ) | 0.01                | 0.025               | –                    |
| <i>IRS1</i>                   | $a_3$                         | 8.26                | 1.88                | –                    |
|                               | $a_4$                         | 24.12               | 4.70                | –                    |
| <i>PI3K</i>                   | $a'_6$                        | 0                   | $1.3 \cdot 10^{-3}$ | $0.66 \cdot 10^{-3}$ |
|                               | $a_6$                         | 124                 | 14.50               | 3.62                 |
| <i>PIP<sub>3</sub></i>        | $a_8$                         | 0.05                | 1.85                | –                    |
| <i>PDK1</i>                   | $a_9$                         | 0.49                | 6.61                | –                    |
| <i>mTORC2</i>                 | $a_{10}$                      | 0.49                | 6.61                | –                    |
|                               | $a_{11}$                      | 0                   | 1                   | –                    |
|                               | $a_{12}$                      | $5 \cdot 10^{-3}$   | $1.2 \cdot 10^{-7}$ | –                    |
| <i>Akt</i>                    | $a_{13}^{\delta}$             | $9.2 \cdot 10^{-4}$ | 0.34                | –                    |
|                               | $a_{15}^{\varepsilon}$        | 0.22                | 5.80                | –                    |
|                               | $a_{17}^{\delta}$             | 0.92                | 3.84                | –                    |
|                               | $a_{17}^{\gamma}$             | 0.20                | 0.29                | –                    |
|                               | $a_{19}^{\varepsilon}$        | 7.95                | 0.67                | –                    |
|                               | $a_{19}^{\gamma}$             | 12.88               | 0.65                | –                    |
|                               | $a_{\theta\varepsilon}$       | 0.62                | 1.0                 | –                    |
|                               | $a_{\eta\delta}$              | 0.11                | $2.5 \cdot 10^{-3}$ | –                    |
| <i>FoxO1</i> **               | $a_{21}$                      | 0.5                 | 0.5                 | –                    |
| <i>GSK3<math>\beta</math></i> | $a_{23}$                      | 2.92                | 12.54               | –                    |
|                               | $a'_{23}$                     | 0                   | 0                   | 3.35                 |
| <i>mTORC1</i>                 | $a_{24}$                      | 0.01                | 0.17                | –                    |
| <i>S6K1</i>                   | $a_{26}$                      | 66.01               | 39.06               | –                    |
|                               | $a_{26}^{\mu}$                | 0.13                | 0.90                | –                    |
|                               | $a_{27}$                      | 74.12               | 460                 | –                    |
| <i>GLUT4</i>                  | $a_{28}$                      | 0.14                | 0.22                | 0.15                 |
|                               | $a_{29}$                      | 24.67               | 1.20                | 0.67                 |
|                               | $a_{30}$                      | 28.16               | 2.01                | –                    |

\*Parameter bounds [0, 500]. \*\* Parameter estimated from FoxO1 data in Figure S5 panel D.
