# Supplementary material for: Insulin Signaling in Insulin Resistance States and Cancer: A Modeling Analysis
Source: PubMed Central journal article supplement (PMC4858213; doi:10.1371/journal.pone.0154415), 2016-05-05
Supplement: pone.0154415.s009.pdf [file pone.0154415.s009.pdf]

**Table S3. Estimates of parameters of the cell population model in control and in cells exposed to 10, 100, and 1000 nM AZD8055.**

|         | $\alpha$ (hr <sup>-1</sup> ) | $\mu'$ (hr <sup>-1</sup> ) | $\mu''$ (hr <sup>-1</sup> ) | $T_2$ (hr) | $T_3$ (hr) | $\lambda_1$ (hr <sup>-1</sup> ) |
|---------|------------------------------|----------------------------|-----------------------------|------------|------------|---------------------------------|
| Control | $7.43 \cdot 10^{-3}$         | $8.52 \cdot 10^{-3}$       | $1.81 \cdot 10^{-1}$        | 10.61      | 8.73       | $3.4 \cdot 10^{-2}$             |
| 10 nM   | $-1.42 \cdot 10^{-2}$        | $1.62 \cdot 10^{-2}$       | $1.98 \cdot 10^{-1}$        | 87.82      | 52.89      | $3.82 \cdot 10^{-3}$            |
| 100 nM  | $-2.12 \cdot 10^{-2}$        | $2.16 \cdot 10^{-2}$       | $1.1 \cdot 10^{-1}$         | 97.91      | 72.6       | $4.56 \cdot 10^{-4}$            |
| 1000 nM | $-3.69 \cdot 10^{-2}$        | $3.72 \cdot 10^{-2}$       | $8.8 \cdot 10^{-2}$         | 97.16      | 77.07      | $3.81 \cdot 10^{-4}$            |
